# Supplementary material
Source: publisher figshare collection journal article supplement (https://geolsoc.figshare.com/articles/dataset/_/3453287)
Supplement: Supplementary file 1 [file 1]

Table A2a: feldspar-bearing parent and feldspar-bearing daughter

| Modelling step                 | Low Sr-Zr to high Sr-Zr (mafic)          |                                          |                                          | High Sr-Zr (mafic)<br>to high Sr-Zr<br>(evolved) |
|--------------------------------|------------------------------------------|------------------------------------------|------------------------------------------|--------------------------------------------------|
|                                | A                                        | B                                        | C                                        | D                                                |
| Parent                         | Montaña Cascajo,<br>phase 1<br>TFC-249   | Montaña Cascajo,<br>phase 3<br>TFC-287   | Montañas Negras<br>TFC-276               | Montaña Reventada<br>basanite<br>TFC-243         |
| Daughter                       | Montaña Reventada<br>basanite<br>TFC-243 | Montaña Reventada<br>basanite<br>TFC-243 | Montaña Reventada<br>basanite<br>TFC-243 | Montaña de Chío<br>TFC-540                       |
| Bulk F [%]                     | 39.73                                    | 37.78                                    | 48.82                                    | 33.68                                            |
| ol (low Sr-Zr)                 | 5.29                                     | 3.87                                     | 1.71                                     |                                                  |
| cpx (low Sr-Zr)                | 19.11                                    | 18.11                                    | 23.74                                    |                                                  |
| plag (low Sr-Zr)               | 8.00                                     | 8.36                                     | 14.10                                    |                                                  |
| ol (high Sr-Zr)                |                                          |                                          |                                          | 2.05                                             |
| cpx (high Sr-Zr)               |                                          |                                          |                                          | 14.15                                            |
| plag (high Sr-Zr)              |                                          |                                          |                                          | 10.12                                            |
| mt                             | 7.29                                     | 7.44                                     | 9.27                                     | 4.96                                             |
| il                             | 0.00                                     | 0.00                                     | 0.00                                     | 0.84                                             |
| ap                             | 0.04                                     | 0.01                                     | 0.00                                     | 1.55                                             |
| Bulk extract composition [wt%] |                                          |                                          |                                          |                                                  |
| SiO <sub>2</sub>               | 38.73                                    | 38.50                                    | 39.81                                    | 39.27                                            |
| TiO <sub>2</sub>               | 5.18                                     | 5.45                                     | 5.33                                     | 5.54                                             |
| Al <sub>2</sub> O <sub>3</sub> | 9.73                                     | 10.34                                    | 12.28                                    | 11.01                                            |
| Fe <sub>2</sub> O <sub>3</sub> | 6.46                                     | 6.83                                     | 6.72                                     | 5.66                                             |
| FeO                            | 12.45                                    | 12.51                                    | 11.13                                    | 10.87                                            |
| MnO                            | 0.24                                     | 0.25                                     | 0.23                                     | 0.26                                             |
| MgO                            | 12.82                                    | 11.54                                    | 8.68                                     | 8.36                                             |
| CaO                            | 12.87                                    | 12.98                                    | 13.80                                    | 14.61                                            |
| Na <sub>2</sub> O              | 1.23                                     | 1.32                                     | 1.66                                     | 2.01                                             |
| K <sub>2</sub> O               | 0.24                                     | 0.27                                     | 0.35                                     | 0.45                                             |
| P <sub>2</sub> O <sub>5</sub>  | 0.04                                     | 0.01                                     | 0.00                                     | 1.96                                             |
| [ppm]                          |                                          |                                          |                                          |                                                  |
| Sr                             | 484.16                                   | 520.32                                   | 655.60                                   | 705.24                                           |
| Zr                             | 78.99                                    | 78.72                                    | 79.84                                    | 152.56                                           |
| Nd                             | 25.66                                    | 24.37                                    | 24.31                                    | 96.81                                            |
| Ni                             | 700.99                                   | 653.35                                   | 476.63                                   | 456.86                                           |
| Bulk D <sub>Sr</sub>           | 0.56                                     | 0.59                                     | 0.83                                     | 0.63                                             |
| Bulk D <sub>Zr</sub>           | 0.33                                     | 0.33                                     | 0.37                                     | 0.44                                             |
| Bulk D <sub>Nd</sub>           | 0.53                                     | 0.50                                     | 0.58                                     | 1.41                                             |
| Bulk D <sub>Ni</sub>           | 6.33                                     | 7.62                                     | 6.57                                     | 103.36                                           |

Table A2b: feldspar-bearing parent and feldspar-free daughter

| Modelling step                 | Low Sr-Zr to high Sr-Zr (mafic)        |                                        |                            | High Sr-Zr (mafic)<br>to high Sr-Zr<br>(evolved) |
|--------------------------------|----------------------------------------|----------------------------------------|----------------------------|--------------------------------------------------|
|                                | A                                      | B                                      | C                          | D                                                |
| Parent                         | Montaña Cascajo,<br>phase 1<br>TFC-249 | Montaña Cascajo,<br>phase 3<br>TFC-287 | Montañas Negras<br>TFC-276 | Chinyero (1909)<br>TFC-052                       |
| Daughter                       | Chinyero (1909)<br>TFC-052             | Chinyero (1909)<br>TFC-052             | Chinyero (1909)<br>TFC-052 | Montaña de Chío<br>TFC-540                       |
| Bulk F [%]                     | 25.38                                  | 23.40                                  | 32.55                      | 33.78                                            |
| ol (low Sr-Zr)                 | 6.33                                   | 4.23                                   | 2.58                       |                                                  |
| cpx (low Sr-Zr)                | 6.62                                   | 7.74                                   | 15.40                      |                                                  |
| plag (low Sr-Zr)               | 8.72                                   | 7.55                                   | 8.57                       |                                                  |
| ol (high Sr-Zr)                |                                        |                                        |                            | 2.46                                             |
| cpx (high Sr-Zr)               |                                        |                                        |                            | 19.77                                            |
| plag (high Sr-Zr)              |                                        |                                        |                            |                                                  |
| mt                             | 3.23                                   | 3.60                                   | 5.93                       | 6.91                                             |
| il                             | 0.19                                   |                                        |                            | 0.56                                             |
| ap                             | 0.29                                   | 0.28                                   | 0.07                       | 4.08                                             |
| Bulk extract composition [wt%] |                                        |                                        |                            |                                                  |
| SiO <sub>2</sub>               | 40.76                                  | 40.18                                  | 39.57                      | 30.63                                            |
| TiO <sub>2</sub>               | 3.76                                   | 4.14                                   | 5.14                       | 6.80                                             |
| Al <sub>2</sub> O <sub>3</sub> | 12.05                                  | 12.03                                  | 11.43                      | 4.16                                             |
| Fe <sub>2</sub> O <sub>3</sub> | 4.51                                   | 5.33                                   | 6.46                       | 7.30                                             |
| FeO                            | 11.12                                  | 11.22                                  | 11.48                      | 14.19                                            |
| MnO                            | 0.20                                   | 0.21                                   | 0.23                       | 0.34                                             |
| MgO                            | 14.79                                  | 12.82                                  | 10.39                      | 11.13                                            |
| CaO                            | 10.10                                  | 11.43                                  | 13.38                      | 19.89                                            |
| Na <sub>2</sub> O              | 1.81                                   | 1.74                                   | 1.52                       | 0.41                                             |
| K <sub>2</sub> O               | 0.42                                   | 0.39                                   | 0.32                       | 0.00                                             |
| P <sub>2</sub> O <sub>5</sub>  | 0.49                                   | 0.51                                   | 0.09                       | 5.14                                             |
| [ppm]                          |                                        |                                        |                            |                                                  |
| Sr                             | 770.25                                 | 740.83                                 | 604.92                     | 547.15                                           |
| Zr                             | 42.85                                  | 54.32                                  | 77.67                      | 212.47                                           |
| Nd                             | 36.80                                  | 41.24                                  | 39.11                      | 126.76                                           |
| Ni                             | 615.88                                 | 371.00                                 | 455.23                     | 583.16                                           |
| Bulk D <sub>Sr</sub>           | 0.89                                   | 0.84                                   | 0.76                       | 0.51                                             |
| Bulk D <sub>Zr</sub>           | 0.18                                   | 0.23                                   | 0.36                       | 0.71                                             |
| Bulk D <sub>Nd</sub>           | 0.86                                   | 0.91                                   | 0.84                       | 2.24                                             |
| Bulk D <sub>Ni</sub>           | 4.04                                   | 7.59                                   | 9.65                       | 28.80                                            |

Table A2c: feldspar-free parent and feldspar-free daughter

| Modelling step                 | Low Sr-Zr to high Sr-Zr (mafic) |                              |                             | High Sr-Zr (mafic)<br>to high Sr-Zr<br>(evolved) |
|--------------------------------|---------------------------------|------------------------------|-----------------------------|--------------------------------------------------|
|                                | A                               | B                            | C                           | D                                                |
| Model                          |                                 |                              |                             |                                                  |
| Parent                         | Garachico (1706)<br>TFC-353     | Montaña del Banco<br>TFC-379 | Montaña Del Topo<br>TFC-120 | Chinyero (1909)<br>TFC-052                       |
| Daughter                       | Chinyero (1909)<br>TFC-052      | Chinyero (1909)<br>TFC-052   | Chinyero (1909)<br>TFC-052  | Chahorra (1798)<br>TFC-231                       |
| Bulk F [%]                     | 24.51                           | 18.81                        | 15.67                       | 31.52                                            |
| ol (low Sr-Zr)                 | 3.03                            |                              |                             |                                                  |
| cpx (low Sr-Zr)                | 18.03                           | 15.52                        | 12.26                       |                                                  |
| plag (low Sr-Zr)               |                                 |                              |                             |                                                  |
| ol (high Sr-Zr)                |                                 |                              |                             | 0.19                                             |
| cpx (high Sr-Zr)               |                                 |                              |                             | 20.82                                            |
| plag (high Sr-Zr)              |                                 |                              |                             |                                                  |
| mt                             | 3.66                            | 3.30                         | 3.41                        | 8.70                                             |
| il                             |                                 |                              |                             |                                                  |
| ap                             |                                 |                              |                             | 1.81                                             |
| Bulk extract composition [wt%] |                                 |                              |                             |                                                  |
| SiO <sub>2</sub>               | 39.32                           | 38.58                        | 36.60                       | 31.65                                            |
| TiO <sub>2</sub>               | 5.20                            | 5.99                         | 6.75                        | 7.68                                             |
| Al <sub>2</sub> O <sub>3</sub> | 5.61                            | 6.32                         | 6.20                        | 4.87                                             |
| Fe <sub>2</sub> O <sub>3</sub> | 6.16                            | 7.11                         | 8.10                        | 9.25                                             |
| FeO                            | 12.11                           | 11.63                        | 13.24                       | 15.29                                            |
| MnO                            | 0.24                            | 0.25                         | 0.28                        | 0.36                                             |
| MgO                            | 15.50                           | 11.44                        | 11.10                       | 10.02                                            |
| CaO                            | 16.34                           | 18.27                        | 17.33                       | 17.99                                            |
| Na <sub>2</sub> O              | 0.37                            | 0.42                         | 0.39                        | 0.45                                             |
| K <sub>2</sub> O               | 0.00                            | 0.00                         | 0.00                        | 0.00                                             |
| P <sub>2</sub> O <sub>5</sub>  | 0.00                            | 0.00                         | 0.00                        | 2.45                                             |
| [ppm]                          |                                 |                              |                             |                                                  |
| Sr                             | 111.09                          | 124.55                       | 118.11                      | 304.76                                           |
| Zr                             | 120.79                          | 135.42                       | 128.42                      | 239.74                                           |
| Nd                             | 31.81                           | 36.01                        | 27.04                       | 226.18                                           |
| Ni                             | 865.67                          | 753.61                       | 568.36                      | 602.71                                           |
| Bulk D <sub>Sr</sub>           | 0.15                            | 0.14                         | 0.13                        | 0.28                                             |
| Bulk D <sub>Zr</sub>           | 0.55                            | 0.60                         | 0.55                        | 0.80                                             |
| Bulk D <sub>Nd</sub>           | 0.66                            | 0.74                         | 0.64                        | 4.00                                             |
| Bulk D <sub>Ni</sub>           | 7.82                            | 8.79                         | 7.84                        | 29.76                                            |

Table A2d: feldspar-free parent and feldspar-bearing daughter

| Modelling step                 | Low Sr-Zr to high Sr-Zr (mafic)          |                                          |                                          | High Sr-Zr (mafic)<br>to high Sr-Zr<br>(evolved) |
|--------------------------------|------------------------------------------|------------------------------------------|------------------------------------------|--------------------------------------------------|
|                                | A                                        | B                                        | C                                        | D                                                |
| Parent                         | Garachico (1706)<br>TFC-353              | Montaña del Banco<br>TFC-379             | Montaña Del Topo<br>TFC-120              | Montaña Reventada<br>basanite<br>TFC-243         |
| Daughter                       | Montaña Reventada<br>basanite<br>TFC-243 | Montaña Reventada<br>basanite<br>TFC-243 | Montaña Reventada<br>basanite<br>TFC-243 | Chahorra (1798)<br>TFC-231                       |
| Bulk F [%]                     | 26.31                                    | 24.13                                    | 23.54                                    | 51.03                                            |
| ol (low Sr-Zr)                 | 3.77                                     | 0.66                                     | 0.69                                     |                                                  |
| cpx (low Sr-Zr)                | 15.65                                    | 16.22                                    | 15.41                                    |                                                  |
| plag (low Sr-Zr)               |                                          |                                          |                                          |                                                  |
| ol (high Sr-Zr)                |                                          |                                          |                                          | 3.18                                             |
| cpx (high Sr-Zr)               |                                          |                                          |                                          | 12.02                                            |
| plag (high Sr-Zr)              |                                          |                                          |                                          | 27.39                                            |
| mt                             | 5.84                                     | 5.72                                     | 5.97                                     | 5.18                                             |
| il                             |                                          |                                          |                                          | 1.26                                             |
| ap                             | 1.04                                     | 1.52                                     | 1.47                                     | 1.99                                             |
| Bulk extract composition [wt%] |                                          |                                          |                                          |                                                  |
| SiO <sub>2</sub>               | 33.58                                    | 32.60                                    | 31.86                                    | 43.90                                            |
| TiO <sub>2</sub>               | 6.31                                     | 6.84                                     | 7.13                                     | 4.04                                             |
| Al <sub>2</sub> O <sub>3</sub> | 4.94                                     | 5.53                                     | 5.48                                     | 16.08                                            |
| Fe <sub>2</sub> O <sub>3</sub> | 7.64                                     | 8.28                                     | 8.65                                     | 4.12                                             |
| FeO                            | 14.86                                    | 13.99                                    | 14.63                                    | 8.01                                             |
| MnO                            | 0.29                                     | 0.29                                     | 0.30                                     | 0.19                                             |
| MgO                            | 14.91                                    | 10.98                                    | 10.92                                    | 5.83                                             |
| CaO                            | 15.47                                    | 18.46                                    | 18.03                                    | 12.14                                            |
| Na <sub>2</sub> O              | 0.31                                     | 0.36                                     | 0.35                                     | 3.24                                             |
| K <sub>2</sub> O               | 0.00                                     | 0.00                                     | 0.00                                     | 0.80                                             |
| P <sub>2</sub> O <sub>5</sub>  | 1.69                                     | 2.68                                     | 2.66                                     | 1.66                                             |
| [ppm]                          |                                          |                                          |                                          |                                                  |
| Sr                             | 247.38                                   | 351.90                                   | 346.76                                   | 1028.18                                          |
| Zr                             | 97.69                                    | 110.40                                   | 107.51                                   | 85.54                                            |
| Nd                             | 94.49                                    | 136.49                                   | 134.59                                   | 76.52                                            |
| Ni                             | 805.62                                   | 557.24                                   | 594.09                                   | 364.00                                           |
| Bulk D <sub>Sr</sub>           | 0.33                                     | 0.40                                     | 0.37                                     | 0.92                                             |
| Bulk D <sub>Zr</sub>           | 0.44                                     | 0.49                                     | 0.46                                     | 0.25                                             |
| Bulk D <sub>Nd</sub>           | 2.20                                     | 3.01                                     | 2.89                                     | 1.12                                             |
| Bulk D <sub>Ni</sub>           | 5.29                                     | 11.40                                    | 12.60                                    | 82.35                                            |

## Scenario 2: feldspar-free parent and feldspar-free daughter composition

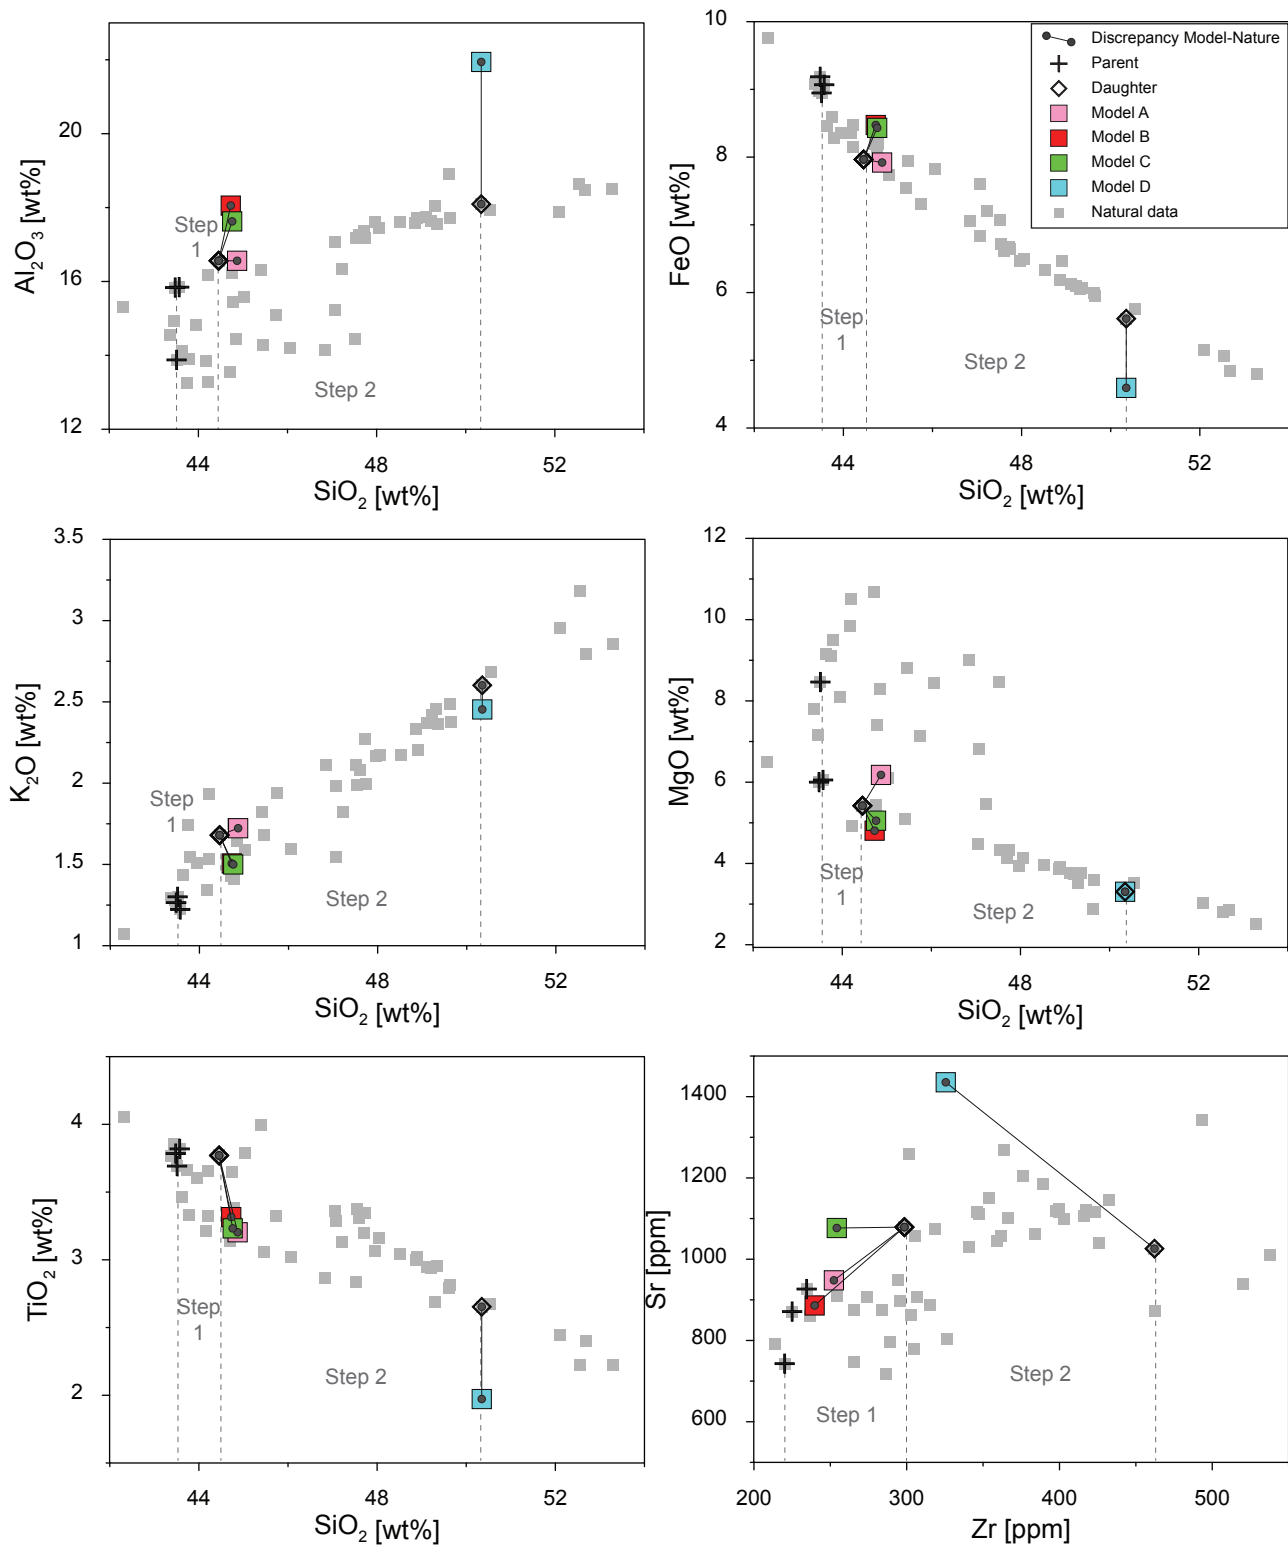

The calculated closed system models of feldspar-free parent and daughter compositions in comparison with natural data. Calculated models are shown as coloured squares, parent compositions are marked by crosses and daughter compositions by open diamonds. The daughter composition of step 1 is the parent for step 2. Discrepancies between the models and their respective daughter compositions are indicated by tie lines.

### Scenario 3: feldspar-bearing parent and feldspar-free daughter composition

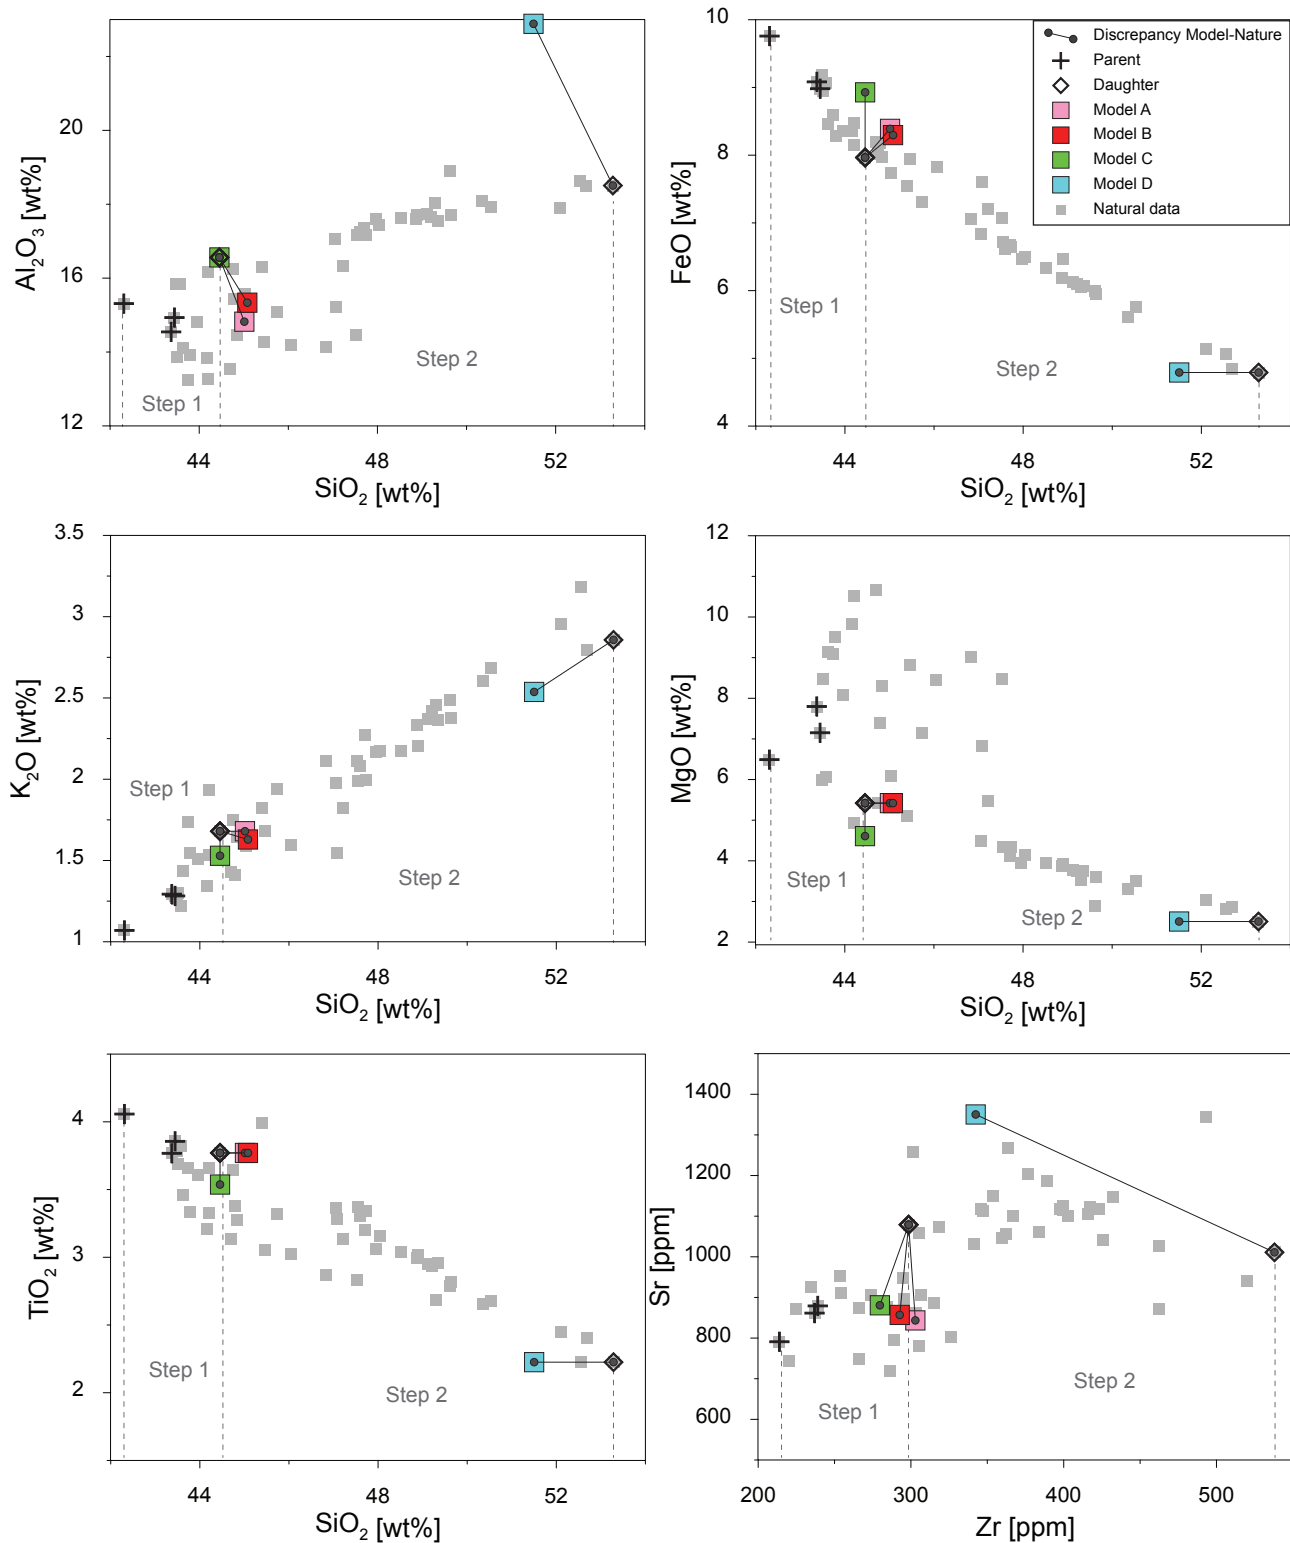

The calculated closed system models of feldspar-bearing parent and feldspar-free daughter compositions in comparison with natural data. Calculated models are shown as coloured squares, parent compositions are marked by crosses and daughter compositions by open diamonds. The daughter composition of step 1 is the parent for step 2. Discrepancies between the models and their respective daughter compositions are indicated by tie lines.

### Scenario 3: feldspar-free parent and feldspar-bearing daughter composition

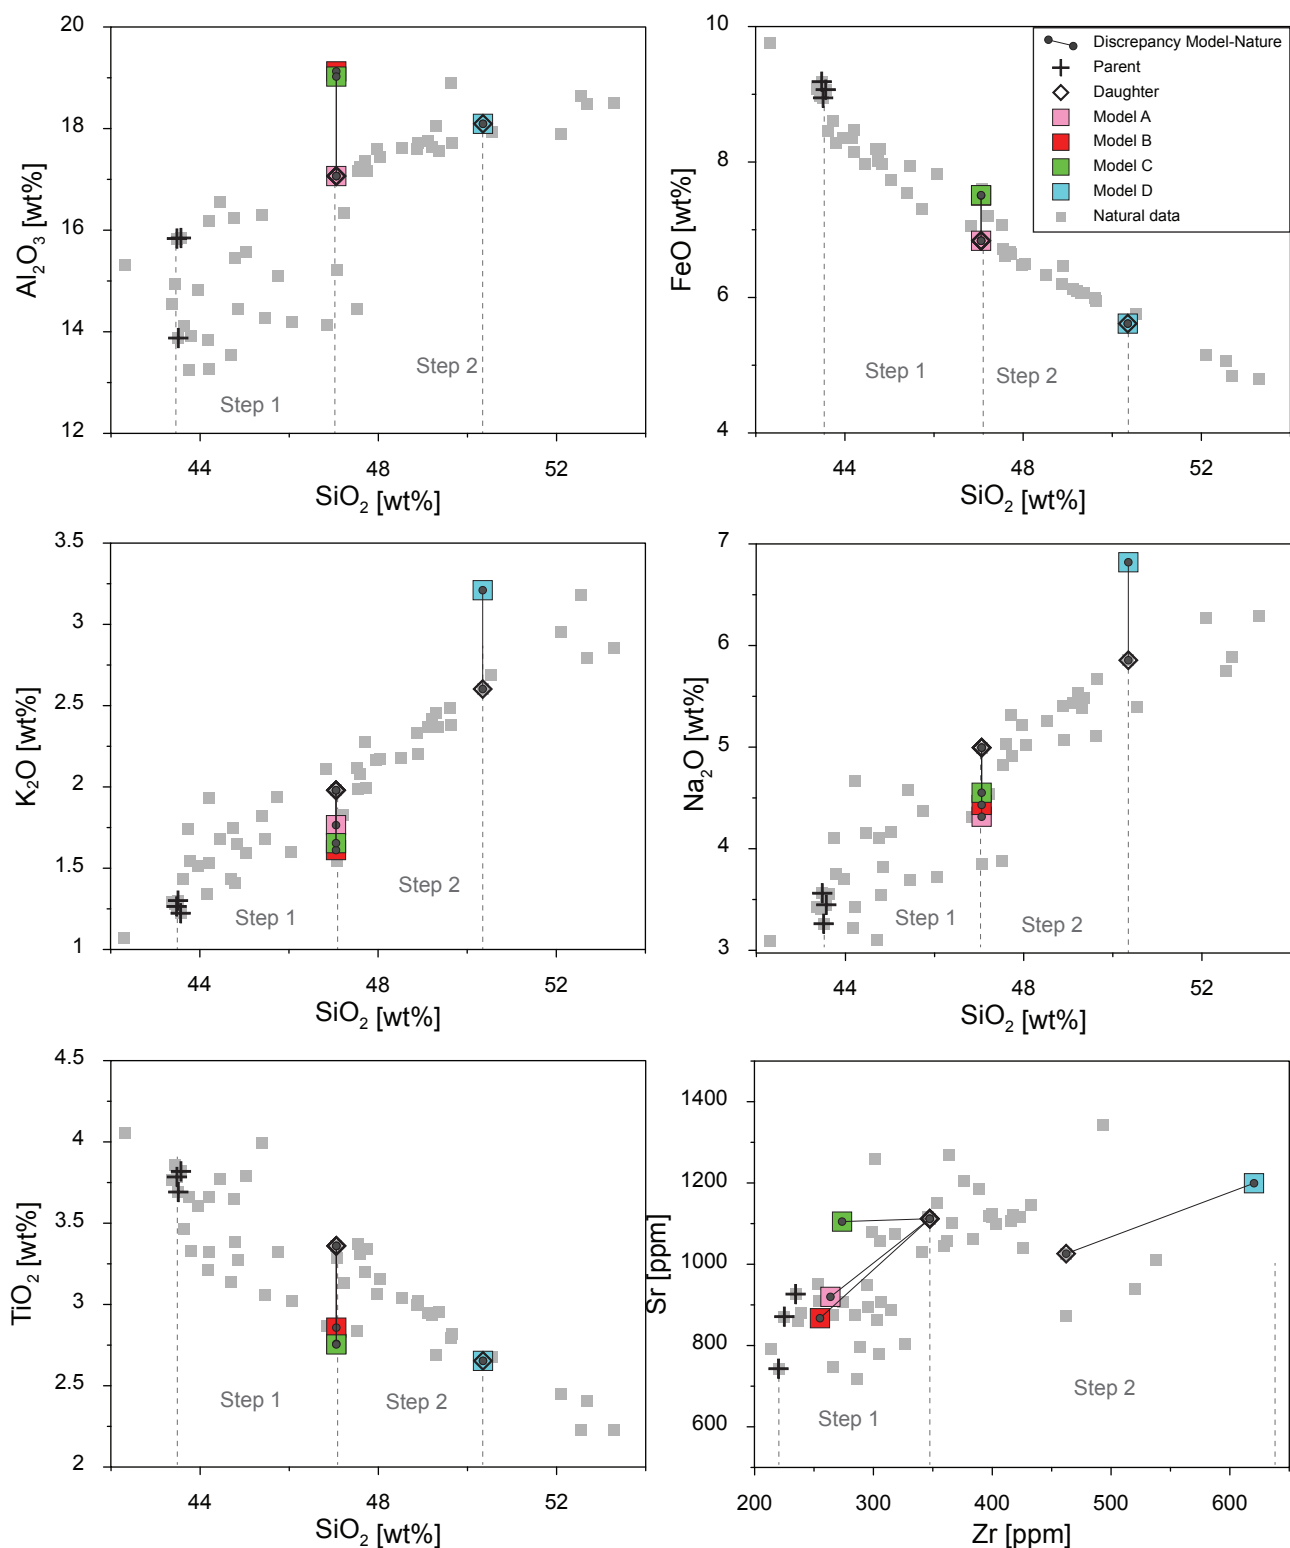

The calculated closed system models of feldspar-free parent and feldspar-bearing daughter compositions in comparison with natural data. Calculated models are shown as coloured squares, parent compositions are marked by crosses and daughter compositions by open diamonds. The daughter composition of step 1 is the parent for step 2. Discrepancies between the models and their respective daughter compositions are indicated by tie lines.
