# Supplementary material
Source: publisher figshare collection journal article supplement (https://geolsoc.figshare.com/articles/dataset/_/3453287)
Supplement: Supplementary file 2 [file 1]

Table A1. Average mineral compositions for calculation of bulk extracts in the low Sr-Zr and high Sr-Zr lavas

|                                | Low Sr-Zr lavas |       |       | High Sr-Zr lavas |       |       | Both lava types |       |       |
|--------------------------------|-----------------|-------|-------|------------------|-------|-------|-----------------|-------|-------|
| <i>Majors [wt%]</i>            | ol              | cpx   | plag  | ol               | cpx   | plag  | mt              | il    | ap    |
| SiO <sub>2</sub>               | 39.77           | 46.71 | 47.71 | 37.82            | 47.40 | 56.48 | 0.27            | 0.19  | 0.61  |
| TiO <sub>2</sub>               | 0               | 2.85  | 0     | 0.08             | 2.95  | 0     | 20.77           | 49.76 | 0     |
| Al <sub>2</sub> O <sub>3</sub> | 0               | 6.80  | 33.30 | 0                | 5.69  | 26.67 | 4.03            | 0.51  | 0     |
| Fe <sub>2</sub> O <sub>3</sub> | 0               | 3.05  | 0.70  | 0                | 3.04  | 0.96  | 26.27           | 9.07  | 0     |
| FeO                            | 16.50           | 5.02  | 0     | 26.11            | 5.02  | 0     | 42.75           | 34.15 | 0.34  |
| MnO                            | 0.21            | 0.12  | 0     | 0.69             | 0.18  | 0     | 0.84            | 0.68  | 0.04  |
| MgO                            | 43.19           | 12.82 | 0     | 34.85            | 12.78 | 0     | 4.92            | 5.53  | 0.15  |
| CaO                            | 0.33            | 22.12 | 15.38 | 0.45             | 22.30 | 8.66  | 0.14            | 0.154 | 56.06 |
| Na <sub>2</sub> O              | 0               | 0.50  | 2.46  | 0                | 0.65  | 5.74  | 0               | 0     | 0.26  |
| K <sub>2</sub> O               | 0               | 0     | 0.45  | 0                | 0     | 1.49  | 0               | 0     | 0     |
| P <sub>2</sub> O <sub>5</sub>  | 0               | 0     | 0     | 0                | 0     | 0     | 0               | 0     | 42.54 |
| Total                          | 100             | 100   | 100   | 100              | 100   | 100   | 100             | 100   | 100   |
| <i>Traces [ppm]</i>            |                 |       |       |                  |       |       |                 |       |       |
| Sr                             | 0               | 163   | 2413  | 0                | 116   | 1576  | 0               | 0     | 3967  |
| Zr                             | 0               | 164   | 0     | 0                | 363   | 0     | 0               | 0     | 0     |
| Ba                             | 0               | 291   | 147   | 0                | 479   | 1651  | 0               | 0     | 2431  |
